# Supplementary material for: Massively parallel reporter assay confirms regulatory potential of hQTLs and reveals important variants in lupus and other autoimmune diseases
Source: PubMed Central journal article supplement — HGG Adv. 2024 Feb 23;5(2):100279. doi: 10.1016/j.xhgg.2024.100279 (PMC10943488; doi:10.1016/j.xhgg.2024.100279), 2024-02-23
Supplement: mmc1.pdf [file mmc1.pdf]

**HGGA, Volume 5**

**Supplemental information**

**Massively parallel reporter assay confirms regulatory potential of hQTLs and reveals important variants in lupus and other autoimmune diseases**

**Yao Fu, Jennifer A. Kelly, Jaanam Gopalakrishnan, Richard C. Pelikan, Kandice L. Tessneer, Satish Pasula, Kiely Grundahl, David A. Murphy, and Patrick M. Gaffney**

## Table of Contents

|                                                         |            |
|---------------------------------------------------------|------------|
| Figure S1. MPRA QC and descriptive statistics.          | Page 2     |
| Figure S2. Tested variants located in ENCODE cREs.      | Page 3     |
| Figure S3. emSeq/emVar variants on SLE risk haplotypes. | Pages 4-7  |
| Figure S4. Box plots of SLE emVar variants.             | Pages 8-11 |
| Figure S5. Box plots of AI emVar variants.              | Page 12    |

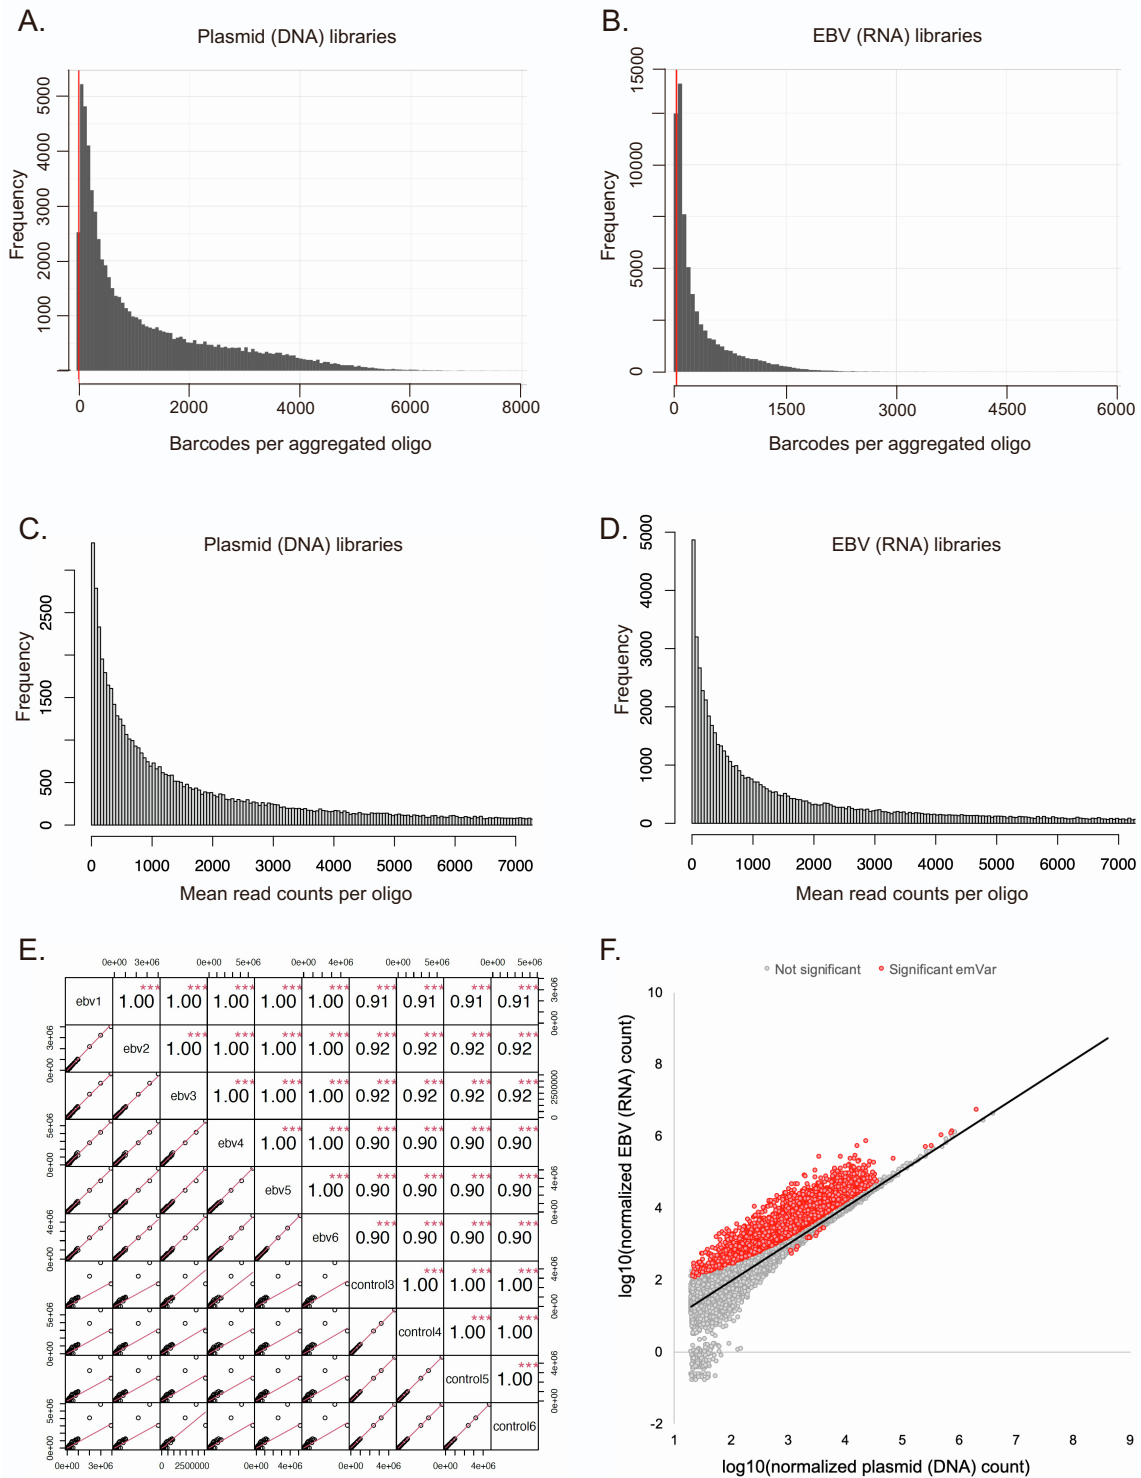

**Figure S1. MPRA QC and descriptive statistics.** **A.** Distribution of the number of oligos with > 10 barcodes ( $n = 66,131$ ; 98.9%) in the aggregated plasmid control libraries. **B.** Distribution of the number of oligos with > 10 barcodes ( $n = 61,096$ , 91.3%) in the aggregated EBV replicate libraries. **C.** Distribution of the number of oligos with > 20 mean counts ( $n = 65,532$ ; 98%) in the aggregated plasmid control libraries. **D.** Distribution of the number of oligos with > 20 mean counts ( $n = 64,361$ , 96.2%) in the aggregated EBV B replicate libraries. **E.** Correlation matrix of oligo counts for each replicate library. **F.** Scatterplot of pairwise comparisons of normalized oligo counts in aggregated plasmid replicates (x-axis) and aggregated EBV replicates (y-axis). Significant emVars are indicated in red.

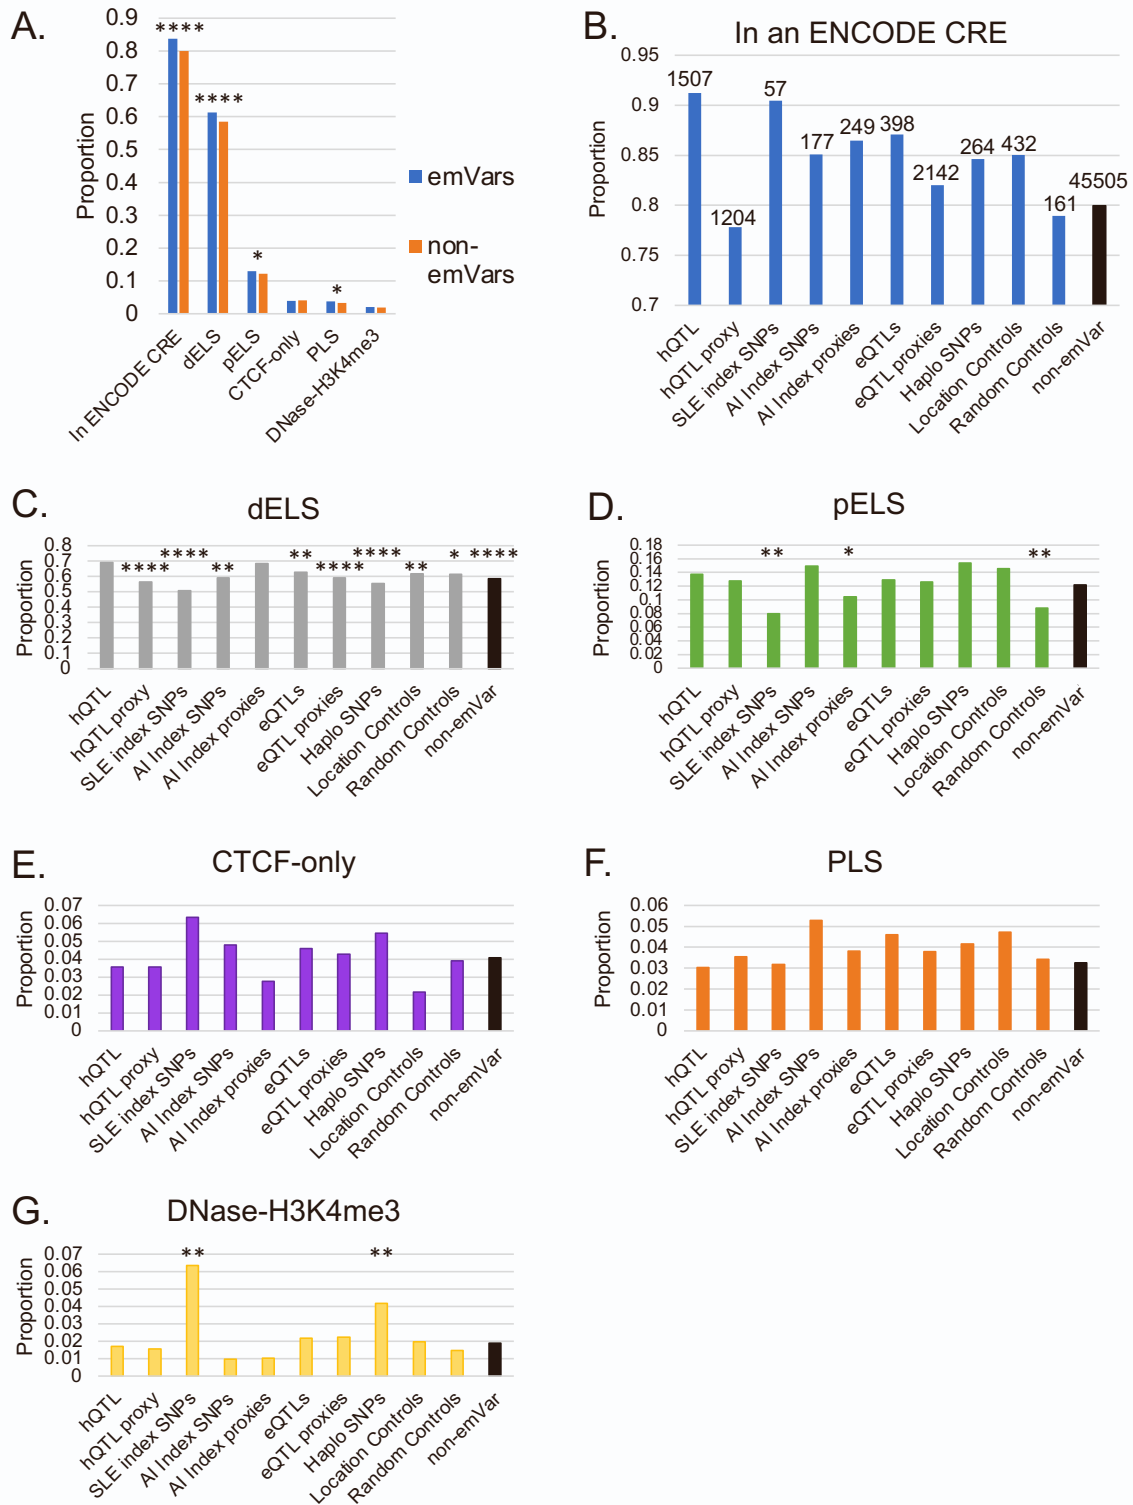

**Figure S2. Tested variants located in ENCODE cREs.** **A.** Proportion (y-axis) of emVars and non-emVars in the different types (x-axis) of cREs. **B.** Proportion (y-axis) of emVars (blue) in cREs by variant type (y-axis). Count is provided above each bar. **C.** Proportion of emVars (gray) in distal enhancer-like signatures by variant type. **D.** Proportion of emVars (green) in proximal enhancerlike signatures by variant type. **E.** Proportion of emVars (purple) in CTCF-only cREs by variant type. **F.** Proportion of emVars (orange) in promoter like signatures by variant type. **G.** Proportion of emVars (yellow) in DNase-H3K4me3 cREs by variant type. Significant differences in proportion of each cRE in hQTLs compared to each other variant type are shown: \* < 0.05; \*\* < 0.01, \*\*\* < 0.001, \*\*\*\* < 0.0001.

A. RASGRP3 – chr2:33227836-33726592

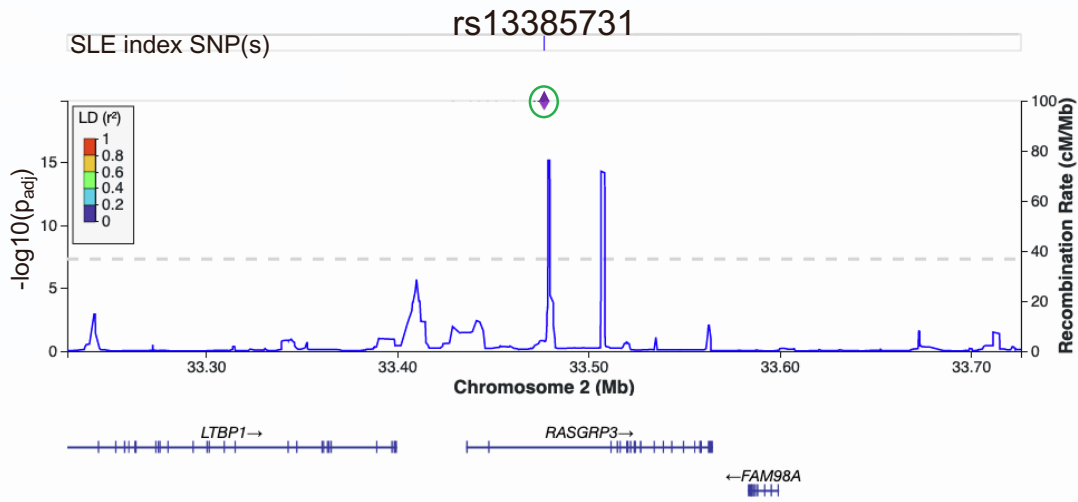

B. PTTG1 – miRNA146 – chr5:160243289-160688961

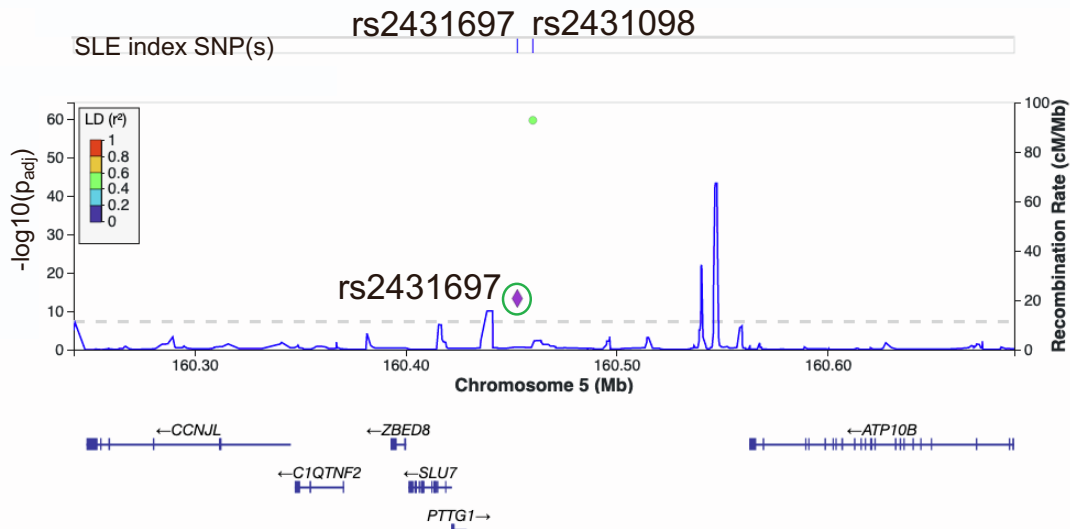

C. IRF5 – chr7:128708061-129299605

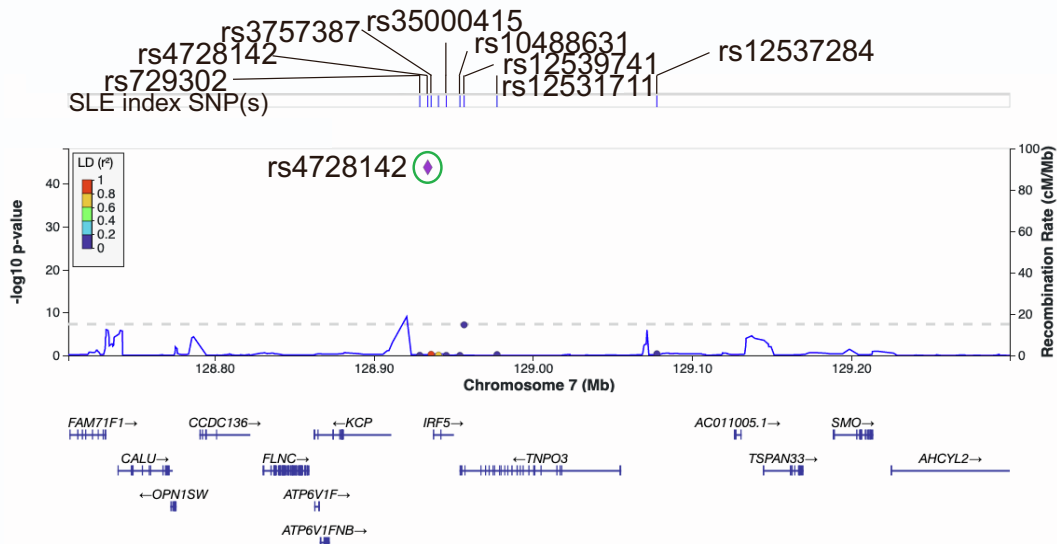

D. BLK – chr8:11400000-11600000

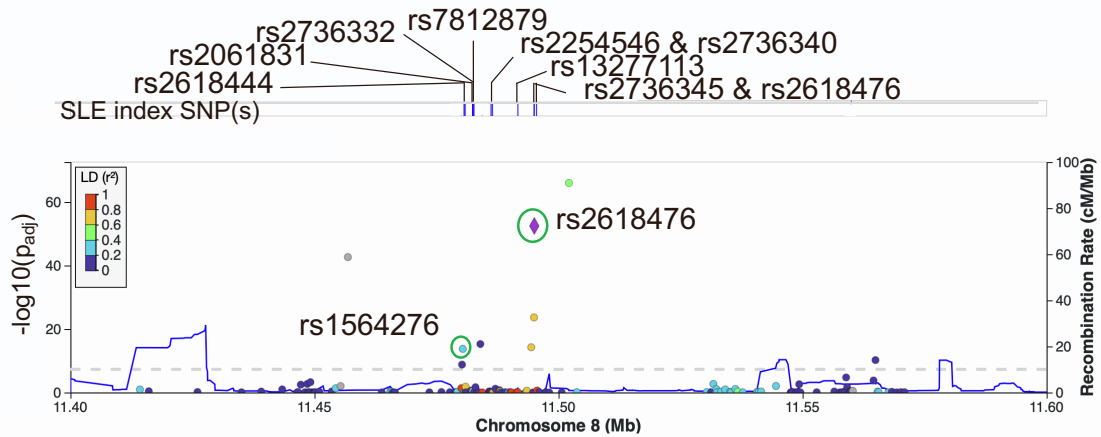

E. CREBL2 - GPR19 - CDKN1B – chr12:12388701-12967318

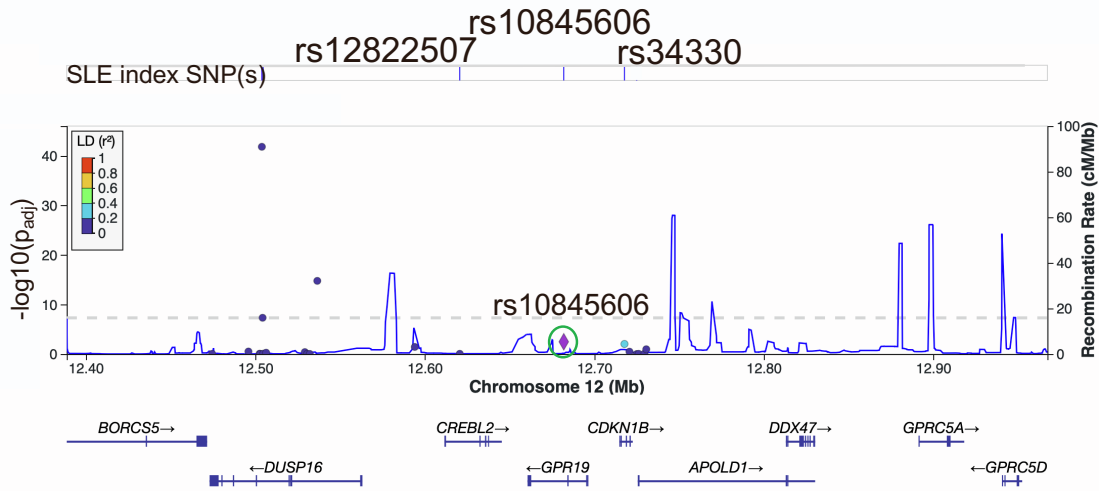

F. IRF8 – chr16:85675256-86223875

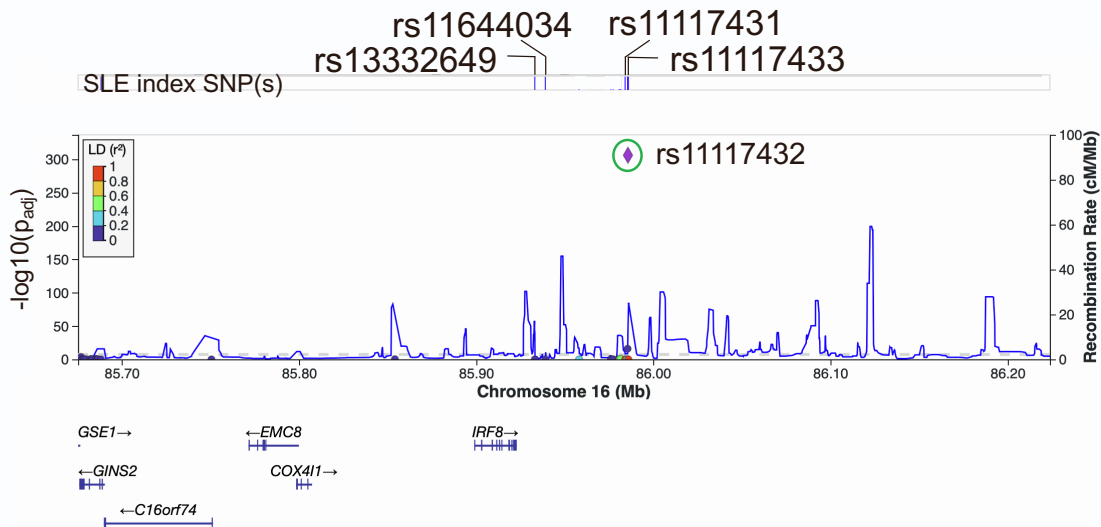

G. CIITA – CLEC16A – SOCS1 – chr16: 10870000-11284542

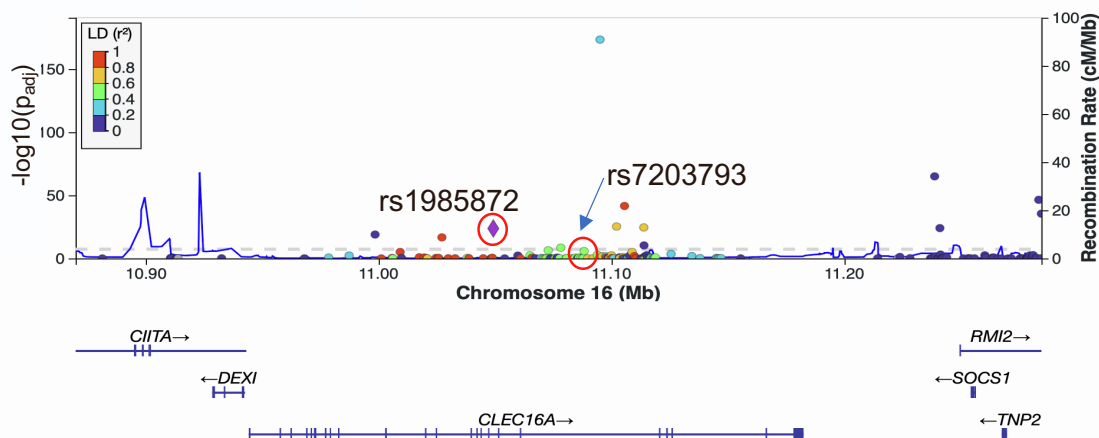

H. CABP1 – SPPL3 – chr12: 120440727-120909910

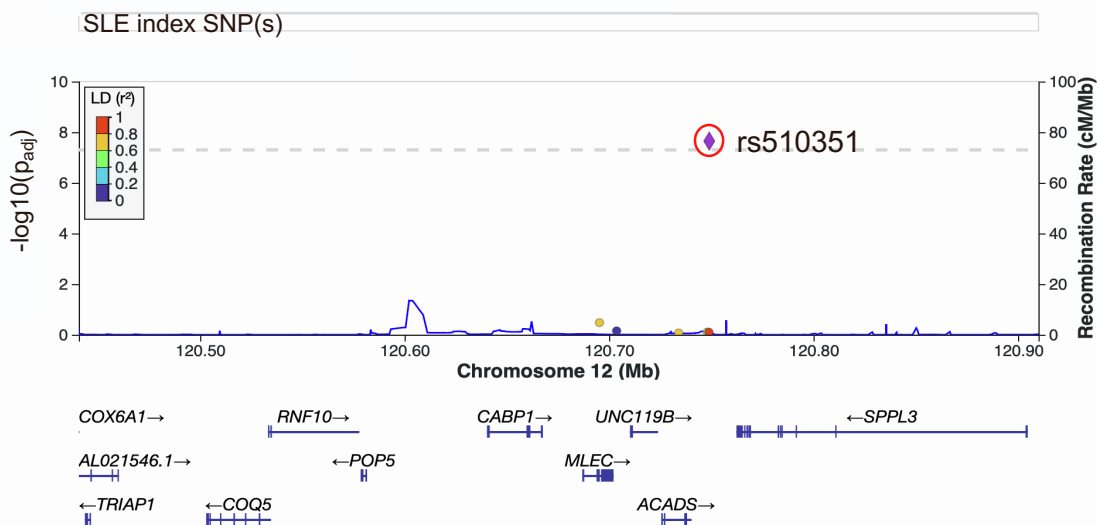

I. SLC15A4 – chr12: 128568772-1290619

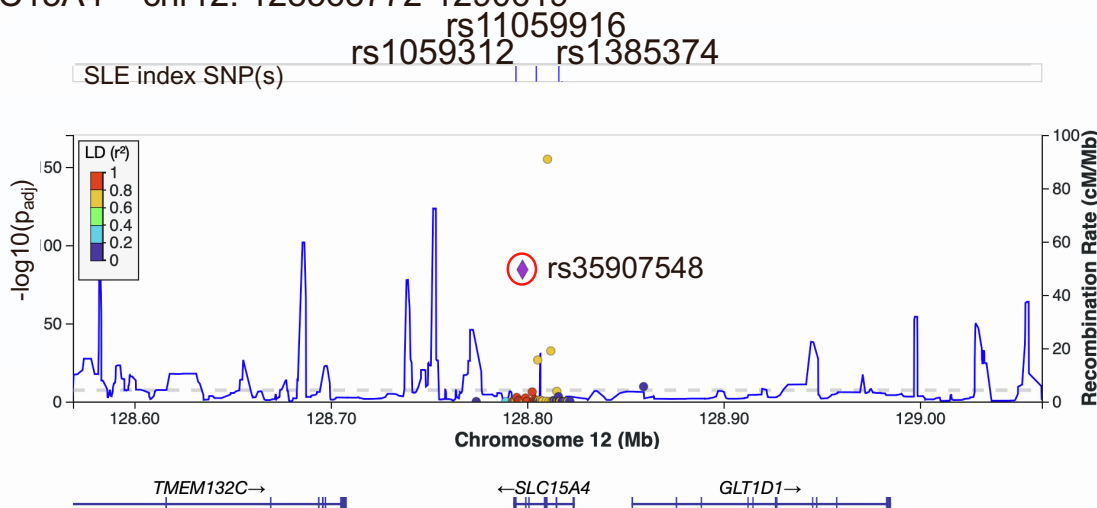

## J. GRB2 – chr17: 75083457-75594195

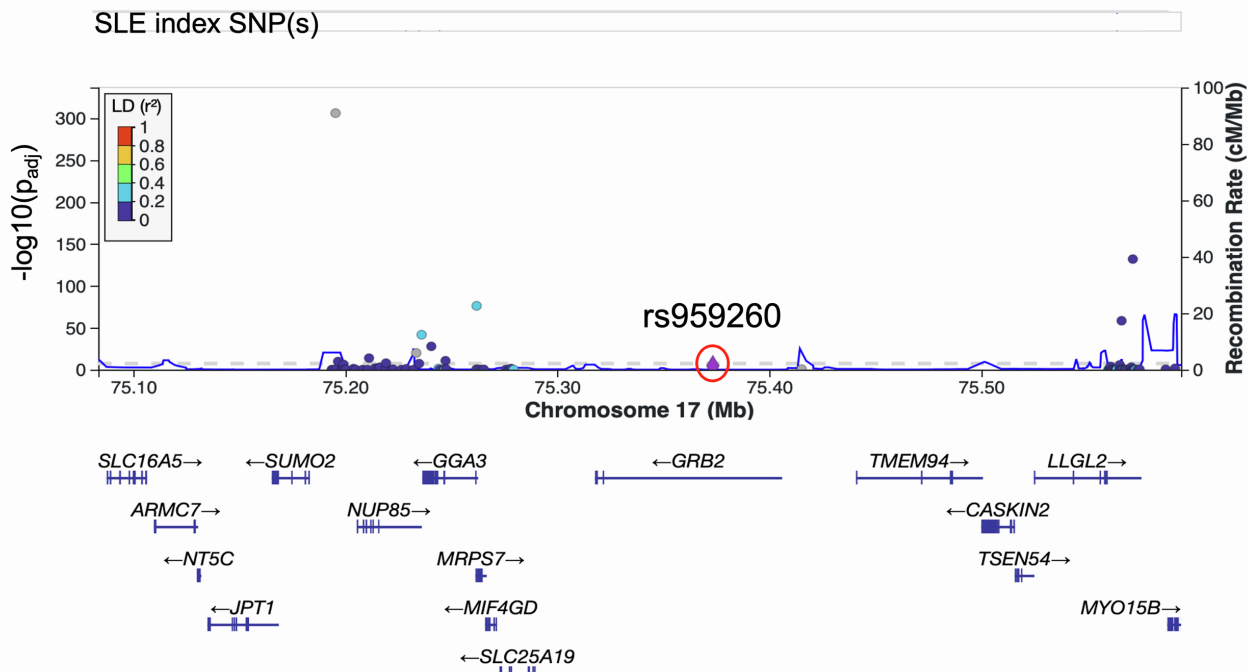

**Figure S3. emVar/AE variants on SLE risk haplotypes.** LocusZoom plots demonstrating emSeq and emVar effects on SLE risk haplotypes. Evaluated index SNPs are presented at the top of graph. Variants evaluated, their genomic location, and genes in the region are plotted on the x-axis. emVars are represented as a purple diamond. Published SLE index SNP emVars are circled in green (**A-F**) and novel SLE emVars are circled in red (**G-J**). Variants are colored based on their LD  $r^2$  values with the circled emVar (see LD key). The  $-\log_{10}(p_{adj})$  of the emSeq score for each variant is plotted on the y-axis.



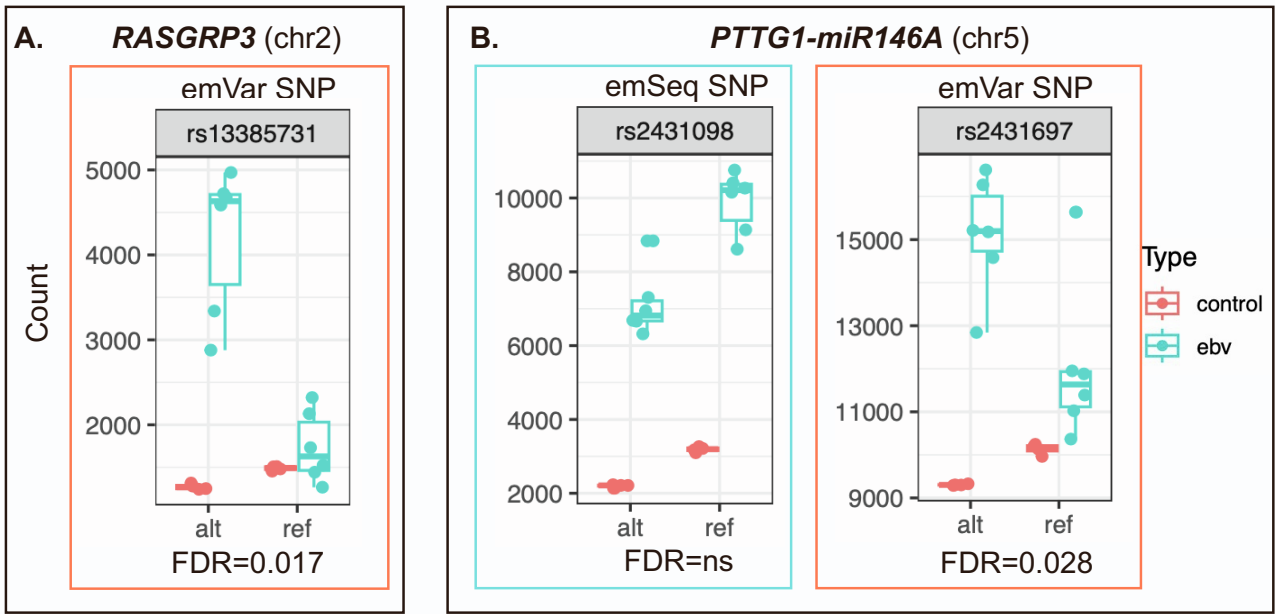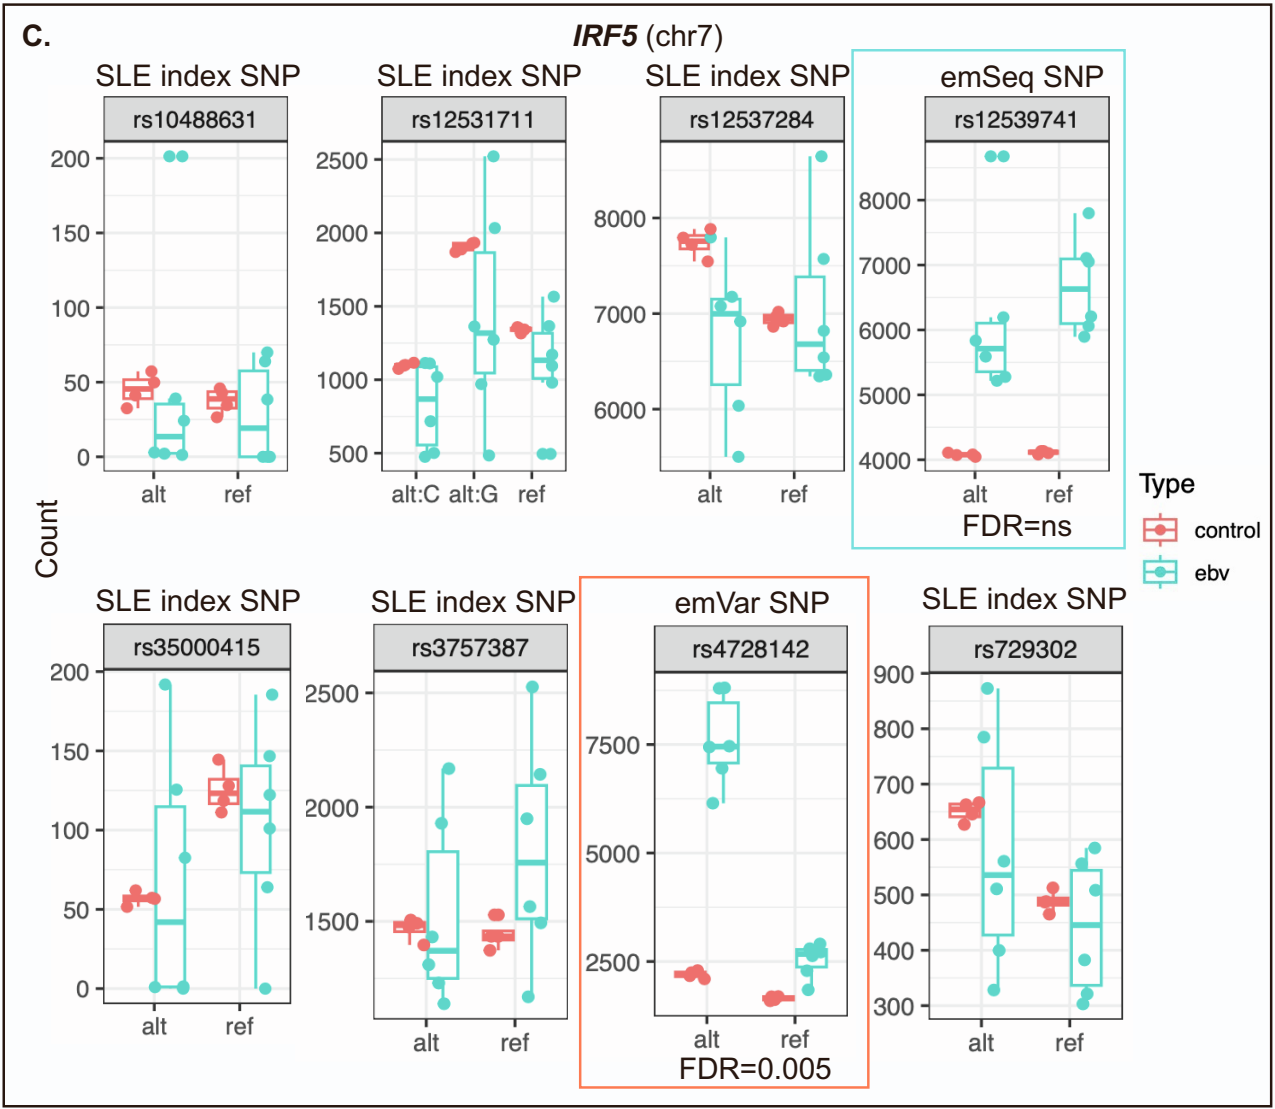

D.

**BLK (chr8)**

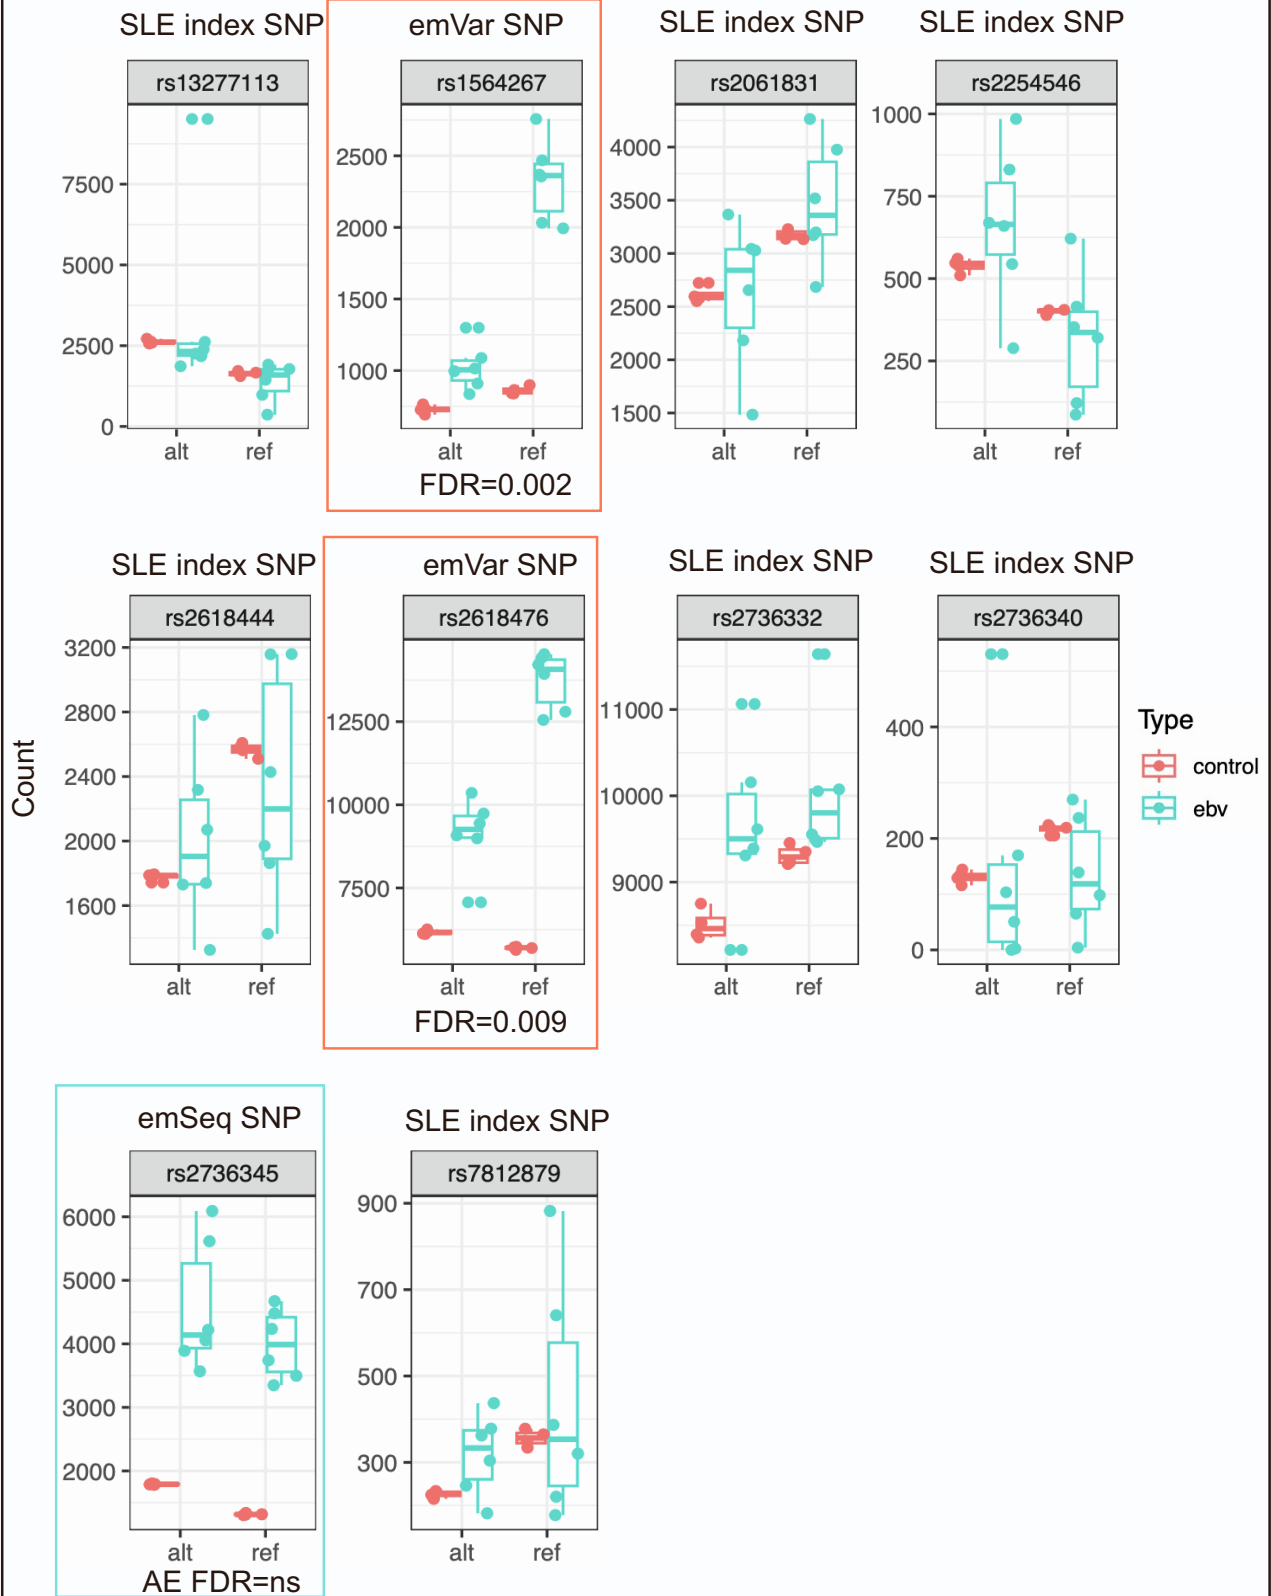

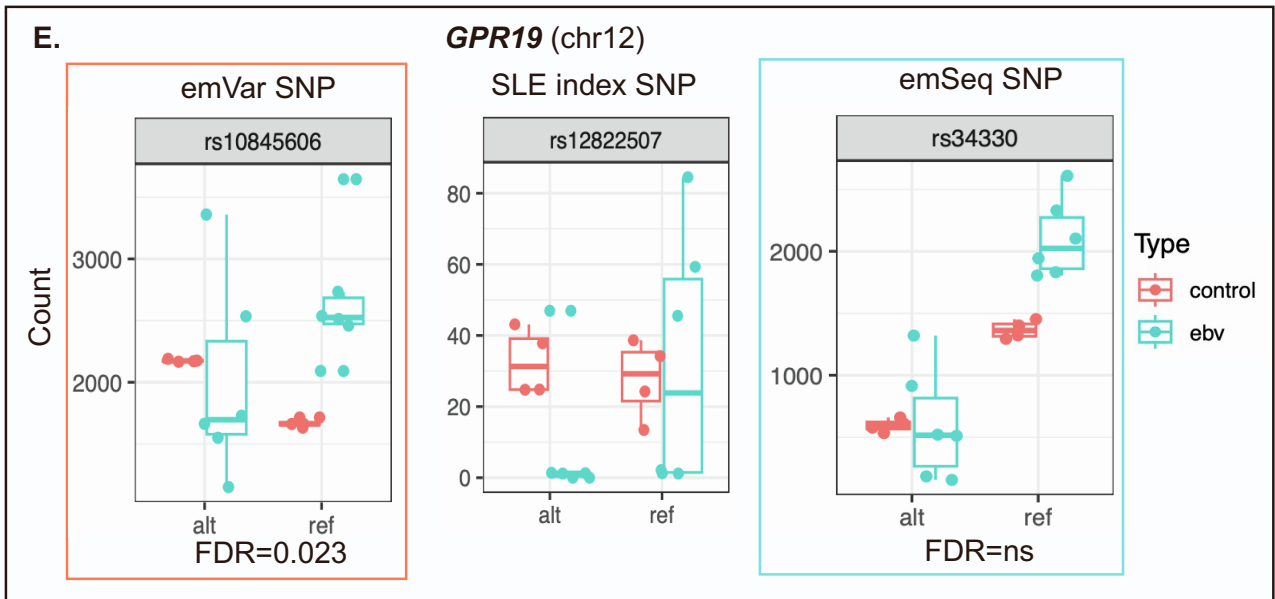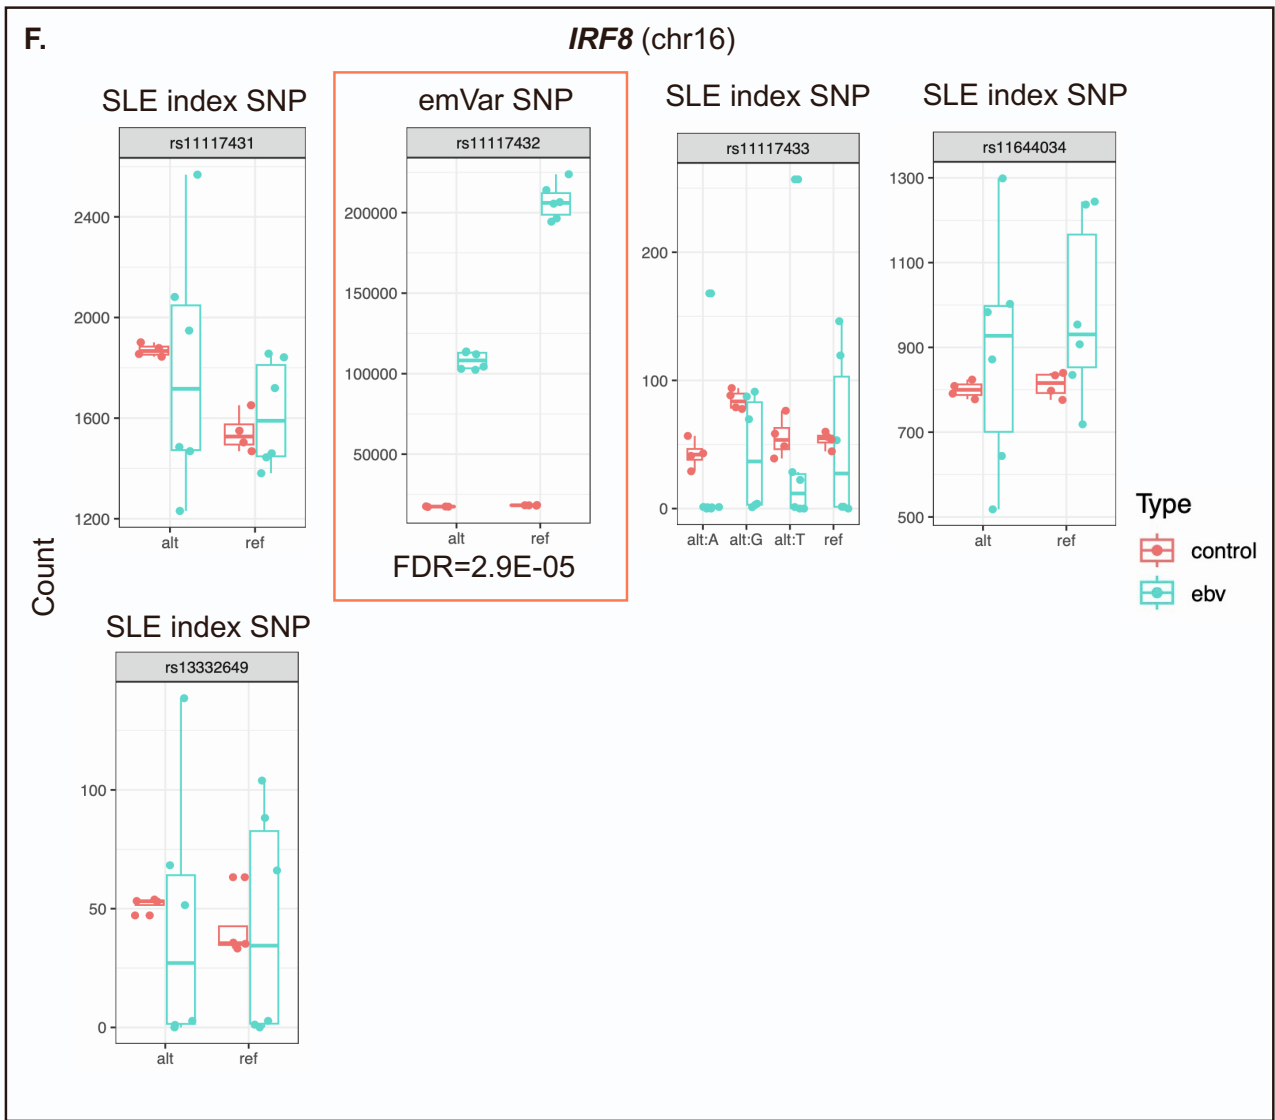

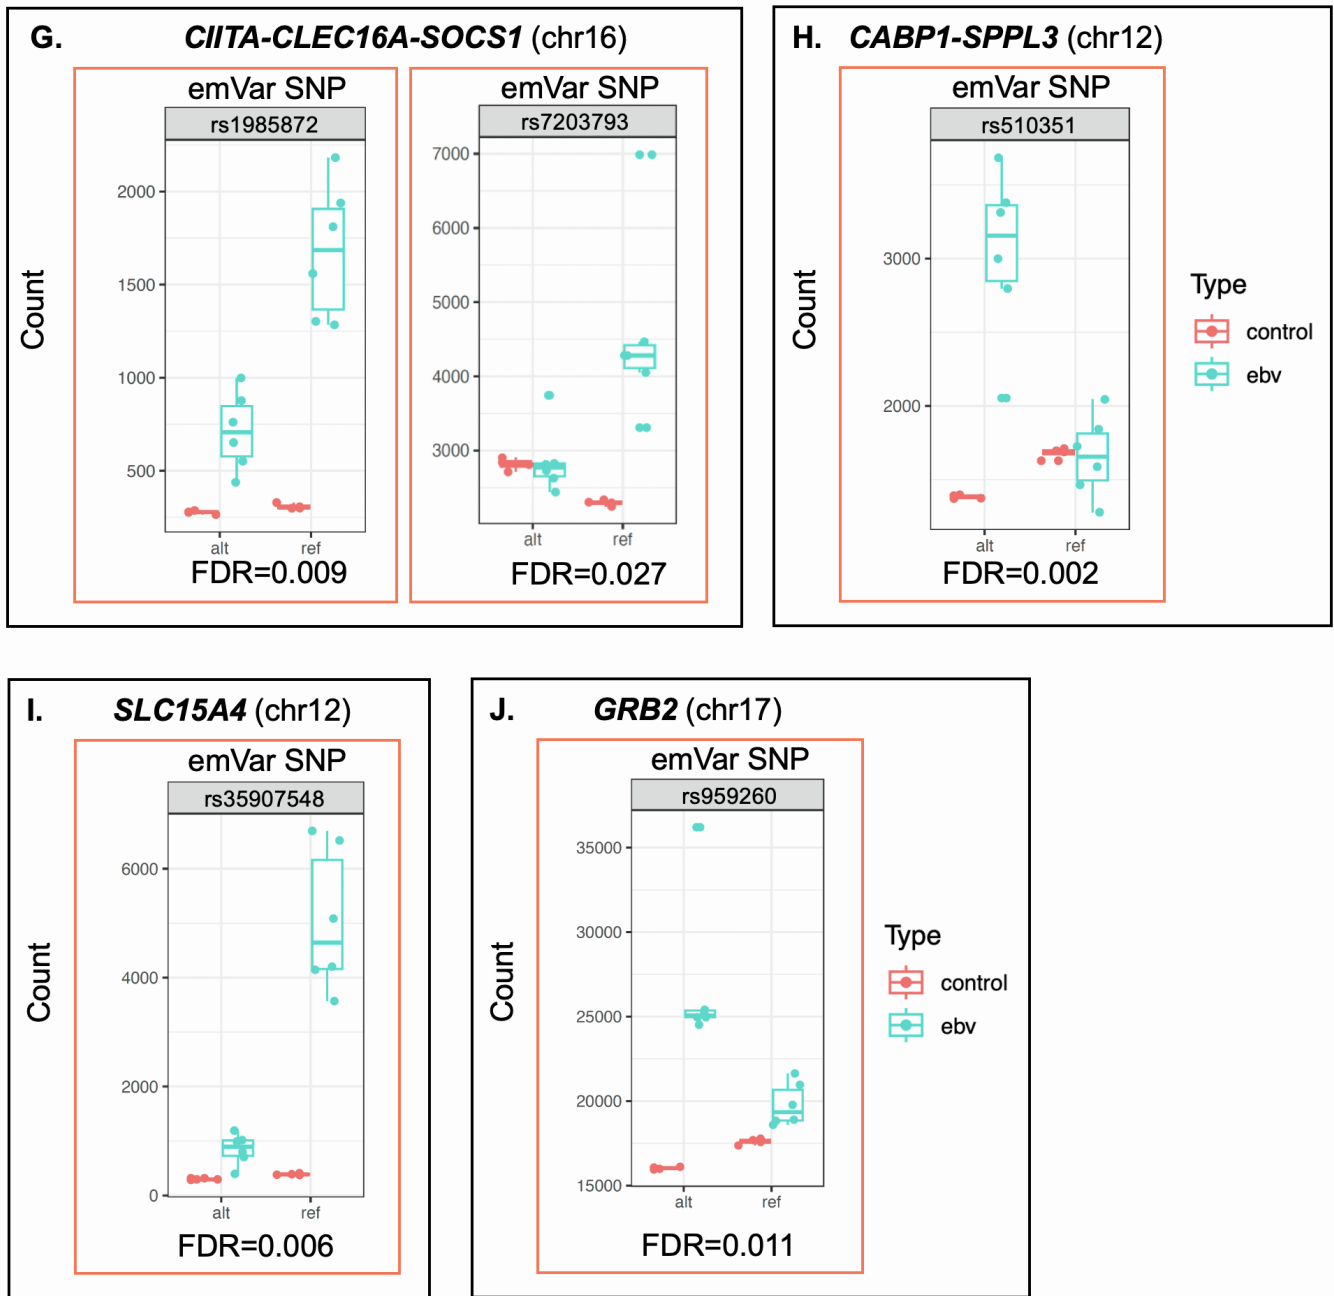

**Figure S4. Box plots of SLE allelic effect variants.** Box plots of normalized counts for EBV B replicates (green) and controls (orange) at each AI allelic variant. Count is plotted on the y-axis and allele (ref/alt) is plotted on the x-axis. The FDR q value and risk gene are provided. EmSeqs are boxed in green and emVars are boxed in orange.

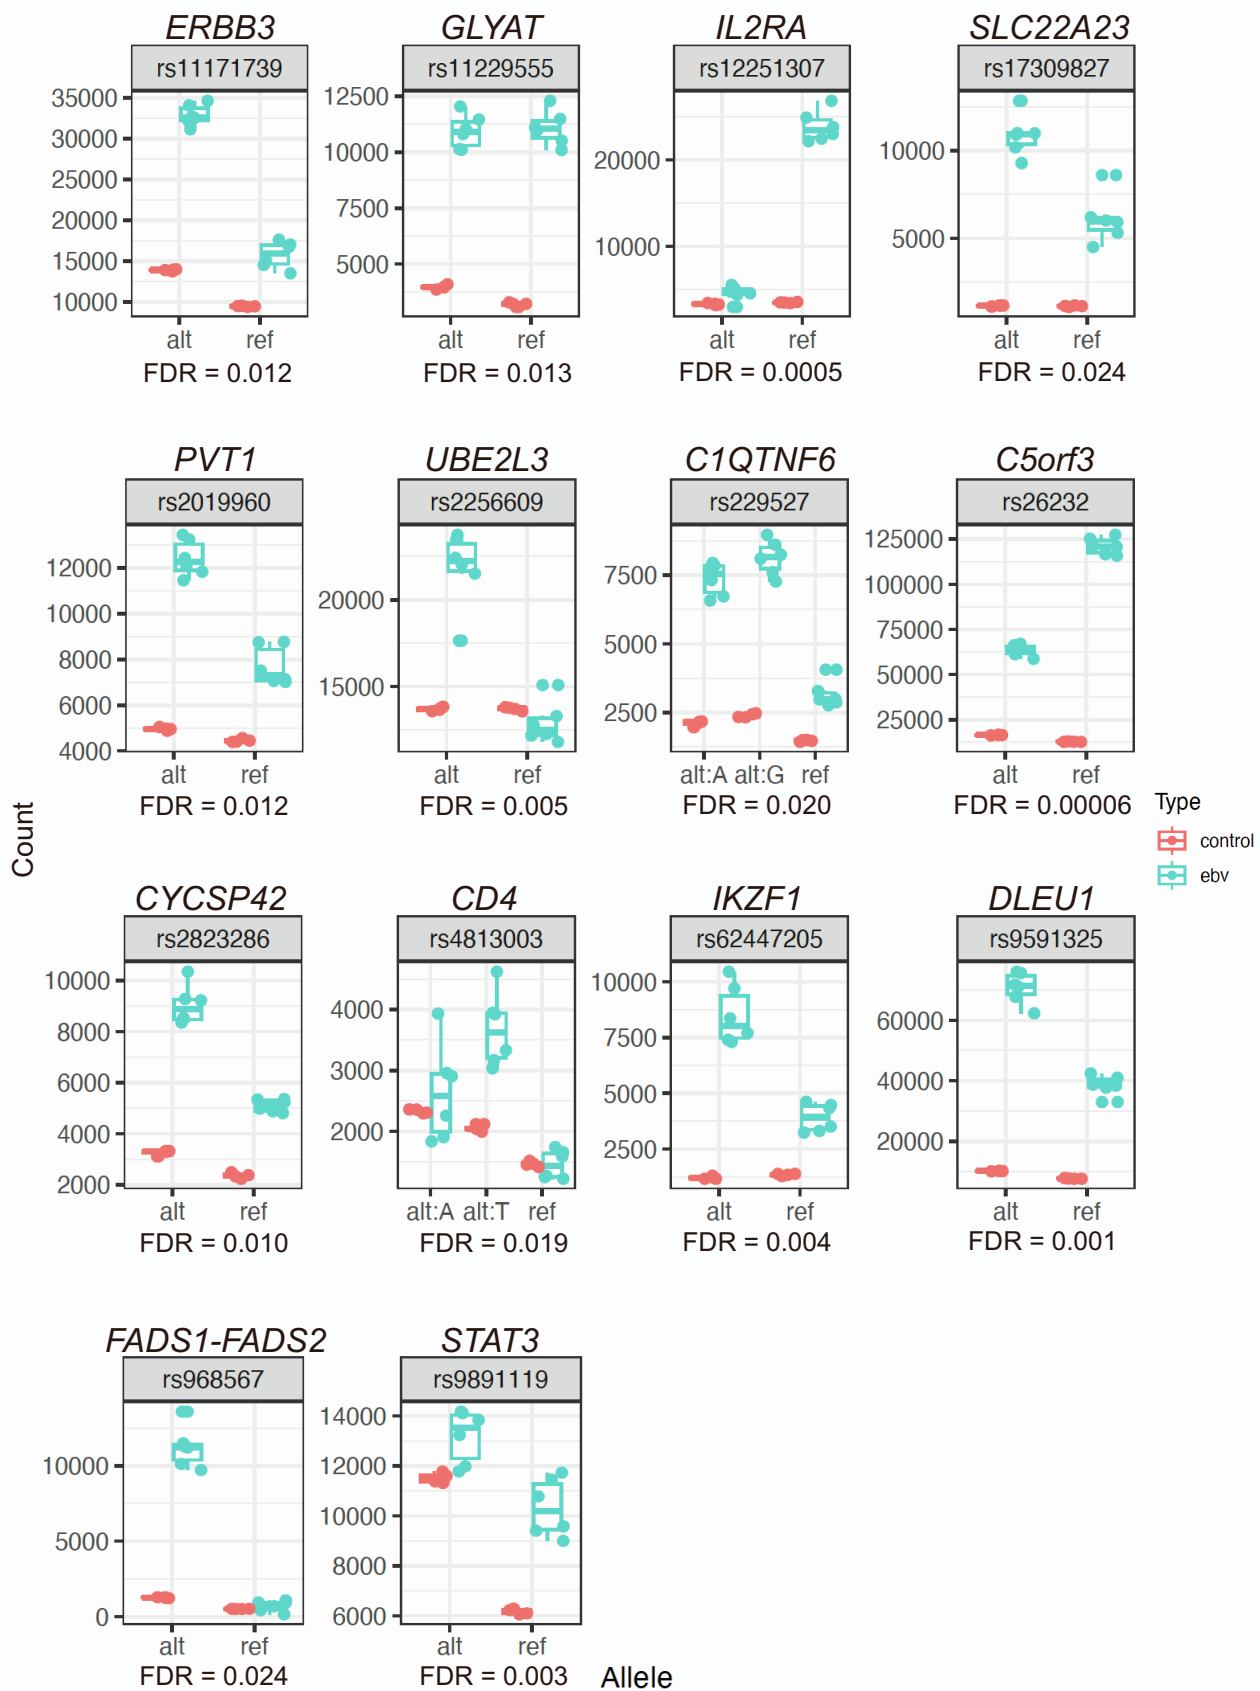

**Figure S5. Box plots of AI emVars.** Box plots of normalized counts for EBV B replicates (green) and controls (orange) at each emVar. Count is plotted on the y-axis and allele (ref/alt) is plotted on the x-axis. The FDR q value and risk gene are provided. Panels are ordered by rsID.

A. SLE Index SNPs

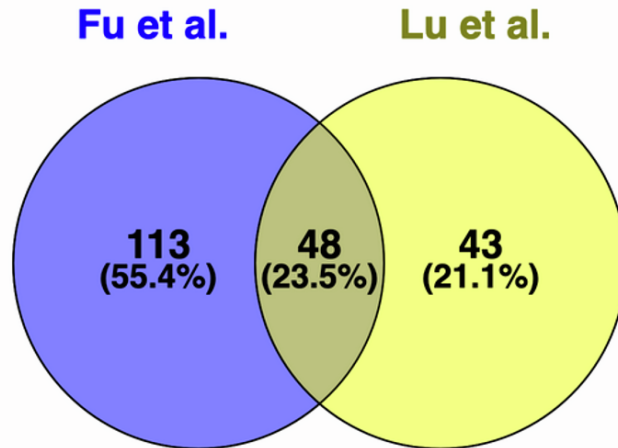

B. SNPs in LD with SLE Index SNPs

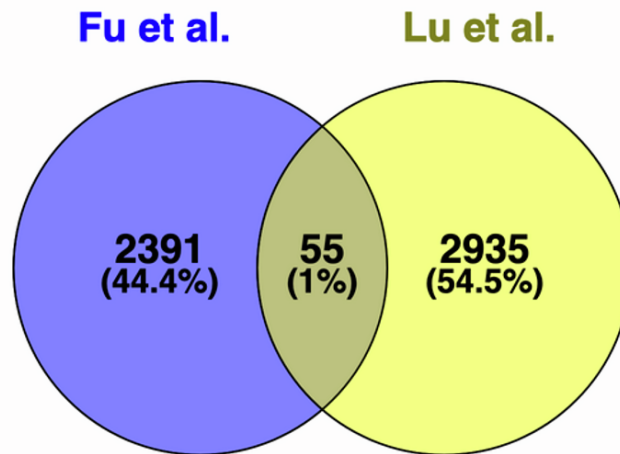

C. Total variants evaluated

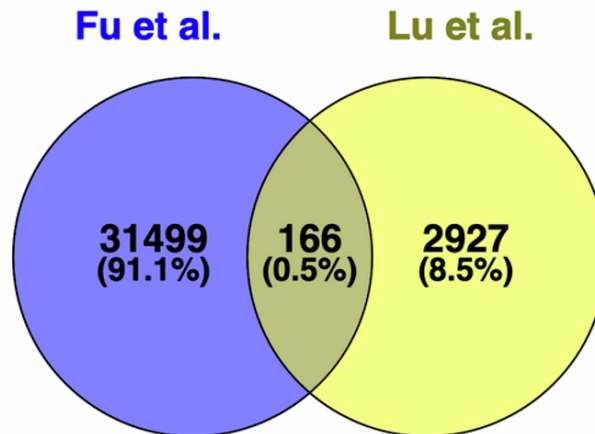

**Figure S6. Venn diagrams displaying overlap between our study (Fu et al.) and an SLE MPRA study by Lu et al<sup>13</sup>. (A) Overlap of SLE index SNPs evaluated by both studies. (B) Overlap of SNPs in LD with SLE index SNPs evaluated by both studies. (C) Overlap of total variants evaluated by both studies.**
